# Supplementary material for: Mindfulness- and acceptance-based interventions for patients with fibromyalgia – A systematic review and meta-analyses
Source: PubMed Central journal article supplement (PMC6719827; doi:10.1371/journal.pone.0221897), 2019-09-03
Supplement: pone.0221897.s001.pdf [file pone.0221897.s001.pdf]

# TIDieR-checklist

| Author Year | Brief name | Recipient | Why | What (materials) | What (procedures) | Who provided | How | Where | When and how much | Tailoring | Modification of intervention throughout trial | Strategies to improve or maintain intervention fidelity | Extent of intervention fidelity |
|-------------|------------|-----------|-----|------------------|-------------------|--------------|-----|-------|-------------------|-----------|-----------------------------------------------|---------------------------------------------------------|---------------------------------|
|             |            |           |     |                  |                   |              |     |       |                   |           |                                               |                                                         |                                 |
