# Supplementary material for: Mindfulness- and acceptance-based interventions for patients with fibromyalgia – A systematic review and meta-analyses
Source: PubMed Central journal article supplement (PMC6719827; doi:10.1371/journal.pone.0221897), 2019-09-03
Supplement: pone.0221897.s002.pdf [file pone.0221897.s002.pdf]

# Data extraction form (trial)

(Title)

## 1. General Information

|                                                                                               |  |
|-----------------------------------------------------------------------------------------------|--|
| <b>Person extracting data (name)</b>                                                          |  |
| <b>Date form completed</b>                                                                    |  |
| <b>Report title</b><br><i>(title of paper/ abstract/ report that data are extracted from)</i> |  |
| <b>Study country</b>                                                                          |  |

## 2. Population and setting

|                            |                                                                                                                         |
|----------------------------|-------------------------------------------------------------------------------------------------------------------------|
| <b>Recruitment details</b> | Number of people screened:<br>Number of people eligible:<br>Number of people recruited:<br>Number of people randomized: |
| <b>Notes:</b>              |                                                                                                                         |

## 3. Methods

|                                                               | <b>Descriptions as stated in report/paper</b>                                                                                                                                 | <b>Location in text</b><br><i>(pg &amp; ¶/fig/table)</i> |
|---------------------------------------------------------------|-------------------------------------------------------------------------------------------------------------------------------------------------------------------------------|----------------------------------------------------------|
| <b>Aim of study</b>                                           |                                                                                                                                                                               |                                                          |
| <b>Design</b> <i>(e.g. parallel, cluster)</i>                 |                                                                                                                                                                               |                                                          |
| <b>Control group</b><br>(What did the control group receive?) | Wait-list <input type="checkbox"/> no intervention <input type="checkbox"/> treatment as usual <input type="checkbox"/><br><b>Other active treatment:</b><br><b>Describe:</b> |                                                          |
| <b>Notes:</b>                                                 |                                                                                                                                                                               |                                                          |

## 4. Risk of Bias assessment

See [Chapter 8](#) of the Cochrane Handbook and *The Cochrane collaboration tool for assessing risk of bias; criteria for judging risk of bias in the 'Risk of bias' assessment tool*

| Domain                                                                                   | Risk of bias             |                          |                          | Support for judgement (describe) | Location in text (pg & ¶/fig/table) |
|------------------------------------------------------------------------------------------|--------------------------|--------------------------|--------------------------|----------------------------------|-------------------------------------|
|                                                                                          | Low risk                 | High risk                | Unclear                  |                                  |                                     |
| <b>Random sequence generation</b><br><i>(selection bias)</i>                             | <input type="checkbox"/> | <input type="checkbox"/> | <input type="checkbox"/> |                                  |                                     |
| <b>Allocation concealment</b><br><i>(selection bias)</i>                                 | <input type="checkbox"/> | <input type="checkbox"/> | <input type="checkbox"/> |                                  |                                     |
| <b>Blinding of participants and personnel</b><br><i>(performance bias)</i>               | <input type="checkbox"/> | <input type="checkbox"/> | <input type="checkbox"/> | Outcome group: All/              |                                     |
| <b>Blinding of outcome assessment: self-reported outcomes</b><br><i>(detection bias)</i> | <input type="checkbox"/> | <input type="checkbox"/> | <input type="checkbox"/> | Outcome group: All/              |                                     |
| <b>Blinding of outcome assessment: objective outcomes</b><br><i>(detection bias)</i>     | <input type="checkbox"/> | <input type="checkbox"/> | <input type="checkbox"/> | Outcome group: All/              |                                     |
| <b>Incomplete outcome data</b><br><i>(attrition bias)</i>                                | <input type="checkbox"/> | <input type="checkbox"/> | <input type="checkbox"/> |                                  |                                     |
| <b>Selective outcome reporting?</b><br><i>(reporting bias)</i>                           | <input type="checkbox"/> | <input type="checkbox"/> | <input type="checkbox"/> |                                  |                                     |
| <b>Other bias</b>                                                                        | <input type="checkbox"/> | <input type="checkbox"/> | <input type="checkbox"/> |                                  |                                     |
| <b>Notes:</b>                                                                            |                          |                          |                          |                                  |                                     |

## 5. Participants

Provide overall data and, if available, comparative data for each intervention or comparison group.

|                               | Setting;      |                      |                    | Location in text (pg & ¶/fig/table) |
|-------------------------------|---------------|----------------------|--------------------|-------------------------------------|
| <b>Specific intervention</b>  |               |                      |                    |                                     |
| <b>Number of participants</b> | <b>Total:</b> | <b>Intervention:</b> | <b>Comparison:</b> |                                     |
| <b>% Female</b>               | <b>Total:</b> | <b>Intervention:</b> | <b>Comparison:</b> |                                     |
| <b>Age</b>                    | <b>Total:</b> | <b>Intervention:</b> | <b>Comparison:</b> |                                     |

|                                  |  |                      |                   |  |
|----------------------------------|--|----------------------|-------------------|--|
| <b>Diagnose criteria</b>         |  |                      |                   |  |
| <b>Sample size</b>               |  | <b>Intervention:</b> | <b>Comparison</b> |  |
| <b>Comments from the authors</b> |  |                      |                   |  |
| <b>Notes:</b>                    |  |                      |                   |  |

## 6. Outcomes / results (In Revman)

Copy and paste table for each outcome

### Primary time point

|                   | Outcome                    | Result | Location in text<br>(pg & ¶/fig/table) |
|-------------------|----------------------------|--------|----------------------------------------|
| Post-intervention | Pain                       |        |                                        |
|                   | Fatigue                    |        |                                        |
|                   | Sleep quality              |        |                                        |
|                   | Psychological stress       |        |                                        |
|                   | Depression                 |        |                                        |
|                   | Anxiety                    |        |                                        |
|                   | Mindfulness                |        |                                        |
|                   | Quality of Life            |        |                                        |
|                   | Work participation ability |        |                                        |

|                                  | Description as stated in report/paper | Location in text<br>(pg & ¶/fig/table) |
|----------------------------------|---------------------------------------|----------------------------------------|
| Key conclusions of study authors |                                       |                                        |
| Notes:                           |                                       |                                        |

|                |  |
|----------------|--|
| Adverse Events |  |
|----------------|--|

### Exclusion after data extraction

**Reasons for exclusion:** (study design? participants? interventions/ outcomes? attrition? bias?)

### Dates:

**Date entered into RevMan and by whom?**

**Date checked and by whom?**
