# Supplementary material for: Mindfulness- and acceptance-based interventions for patients with fibromyalgia – A systematic review and meta-analyses
Source: PubMed Central journal article supplement (PMC6719827; doi:10.1371/journal.pone.0221897), 2019-09-03
Supplement: pone.0221897.s004.pdf [file pone.0221897.s004.pdf]

**Table over item 11 and 12 in TIDieR-checklist specified**

| <b>Authors</b>                       | <b>Strategies to improve or maintain intervention adherence and fidelity</b>                     | <b>Extent of intervention adherence</b>      | <b>Effect size, follow-up</b>                                                                                                   |
|--------------------------------------|--------------------------------------------------------------------------------------------------|----------------------------------------------|---------------------------------------------------------------------------------------------------------------------------------|
| Luciano et al. (36)<br>(ACT)         | Instructors were video recorded, participants were interviewed before intervention               | n=45: 88% completed the intervention         | Pain: -0.66, depression: -1.01, anxiety: -0.73, health-related quality of life: -1.06                                           |
| Wicksell et al. (40)<br>(ACT)        | Instructors were video recorded. If unable to attend a session, 30-minutes summary were provided | n=19: 87% completed the intervention         | Pain: -0.80, depression: -0.63, anxiety: -0.54                                                                                  |
| Simister et al. (42)<br>(Online ACT) | E-mail reminders to participants                                                                 | n=30: 100% completed the intervention        | Pain: -0.11, depression: -0.55, sleep quality: -0.52, mindfulness: -0.25                                                        |
| Cash et al. (41)<br>(MBSR)           | Attendance monitored and absence tracked                                                         | n=51: 82% completed at least 4 of 8 sessions | Pain: 0.00, sleep quality: -0.31                                                                                                |
| Septhou et al. (39)<br>(MBSR)        | Attendance monitored and absence tracked                                                         | n=51: 82% completed at least 4 of 8 sessions | Depression: -0.19                                                                                                               |
| Astin et al. (34)<br>(MBSR)          | No strategies reported                                                                           | n=31: 61% completed the intervention         | Pain: -0.04, depression: -0.20                                                                                                  |
| Grossmann et al. (35)<br>(MBSR)      | No strategies reported                                                                           | n=39: 88% completed at least 4 of 8 sessions | *Pain: -0.01, depression: -0.49, anxiety: -0.21,                                                                                |
| Schmidt et al. (38)<br>(MBSR)        | No strategies reported                                                                           | n=45: 89% completed at least 4 of 8 sessions | Pain: -0.09, depression: -0.16, anxiety: -0.09, sleep quality: -0.08, health-related quality of life: -0.17, mindfulness: -0.29 |
| Parra Delgado et al. (37)<br>(MBCT)  | No strategies reported                                                                           | n=15: 88% completed the intervention         | Depression: -0.80                                                                                                               |

\*End of treatment data.
