# Supplementary material for: Mindfulness- and acceptance-based interventions for patients with fibromyalgia – A systematic review and meta-analyses
Source: PubMed Central journal article supplement (PMC6719827; doi:10.1371/journal.pone.0221897), 2019-09-03
Supplement: pone.0221897.s005.pdf [file pone.0221897.s005.pdf]

## GRADE evidence profile

| Certainty assessment |              |              |               |              |             |                      | № of patients |         | Effect            |                   | Certainty |
|----------------------|--------------|--------------|---------------|--------------|-------------|----------------------|---------------|---------|-------------------|-------------------|-----------|
| № of studies         | Study design | Risk of bias | Inconsistency | Indirectness | Imprecision | Other considerations | Mindfulness   | control | Relative (95% CI) | Absolute (95% CI) |           |

### Pain End of treatment

|   |                   |                      |                      |             |             |      |     |     |   |                                                    |             |
|---|-------------------|----------------------|----------------------|-------------|-------------|------|-----|-----|---|----------------------------------------------------|-------------|
| 7 | randomised trials | serious <sup>a</sup> | serious <sup>b</sup> | not serious | not serious | none | 263 | 331 | - | SMD 0.46<br>SD lower<br>(0.75 lower to 0.17 lower) | ⊕⊕○○<br>LOW |
|---|-------------------|----------------------|----------------------|-------------|-------------|------|-----|-----|---|----------------------------------------------------|-------------|

### Pain Follow-up

|   |                   |                      |             |             |                      |      |     |     |   |                                                     |             |
|---|-------------------|----------------------|-------------|-------------|----------------------|------|-----|-----|---|-----------------------------------------------------|-------------|
| 6 | randomised trials | serious <sup>c</sup> | not serious | not serious | serious <sup>d</sup> | none | 224 | 313 | - | SMD 0.25<br>SD lower<br>(0.52 lower to 0.01 higher) | ⊕⊕○○<br>LOW |
|---|-------------------|----------------------|-------------|-------------|----------------------|------|-----|-----|---|-----------------------------------------------------|-------------|

### Depression End of treatment

|   |                   |                      |                      |             |             |      |     |     |   |                                                    |             |
|---|-------------------|----------------------|----------------------|-------------|-------------|------|-----|-----|---|----------------------------------------------------|-------------|
| 8 | randomised trials | serious <sup>a</sup> | serious <sup>b</sup> | not serious | not serious | none | 277 | 347 | - | SMD 0.49<br>SD lower<br>(0.85 lower to 0.12 lower) | ⊕⊕○○<br>LOW |
|---|-------------------|----------------------|----------------------|-------------|-------------|------|-----|-----|---|----------------------------------------------------|-------------|

### Depression Follow-up

|   |                   |                      |                      |             |             |      |     |     |   |                                                    |             |
|---|-------------------|----------------------|----------------------|-------------|-------------|------|-----|-----|---|----------------------------------------------------|-------------|
| 7 | randomised trials | serious <sup>c</sup> | serious <sup>b</sup> | not serious | not serious | none | 238 | 329 | - | SMD 0.48<br>SD lower<br>(0.77 lower to 0.19 lower) | ⊕⊕○○<br>LOW |
|---|-------------------|----------------------|----------------------|-------------|-------------|------|-----|-----|---|----------------------------------------------------|-------------|

### Anxiety End of treatment

|   |                   |                      |             |             |             |      |     |     |   |                                                    |                  |
|---|-------------------|----------------------|-------------|-------------|-------------|------|-----|-----|---|----------------------------------------------------|------------------|
| 4 | randomised trials | serious <sup>a</sup> | not serious | not serious | not serious | none | 150 | 228 | - | SMD 0.37<br>SD lower<br>(0.71 lower to 0.02 lower) | ⊕⊕⊕○<br>MODERATE |
|---|-------------------|----------------------|-------------|-------------|-------------|------|-----|-----|---|----------------------------------------------------|------------------|

### Anxiety Follow-up

|   |                   |                      |                      |             |                      |      |     |     |   |                                                    |                  |
|---|-------------------|----------------------|----------------------|-------------|----------------------|------|-----|-----|---|----------------------------------------------------|------------------|
| 3 | randomised trials | serious <sup>a</sup> | serious <sup>b</sup> | not serious | serious <sup>d</sup> | none | 111 | 210 | - | SMD 0.44<br>SD lower<br>(0.9 lower to 0.02 higher) | ⊕○○○<br>VERY LOW |
|---|-------------------|----------------------|----------------------|-------------|----------------------|------|-----|-----|---|----------------------------------------------------|------------------|

**Sleep quality End of treatment**

|   |                   |                      |             |             |                      |      |     |     |   |                                                    |             |
|---|-------------------|----------------------|-------------|-------------|----------------------|------|-----|-----|---|----------------------------------------------------|-------------|
| 3 | randomised trials | serious <sup>a</sup> | not serious | not serious | serious <sup>d</sup> | none | 126 | 173 | - | SMD 0.33<br>SD lower<br>(0.7 lower to 0.04 higher) | ⊕⊕○○<br>LOW |
|---|-------------------|----------------------|-------------|-------------|----------------------|------|-----|-----|---|----------------------------------------------------|-------------|

**Sleep quality Follow-up**

|   |                   |                      |             |             |             |      |     |     |   |                                           |                  |
|---|-------------------|----------------------|-------------|-------------|-------------|------|-----|-----|---|-------------------------------------------|------------------|
| 3 | randomised trials | serious <sup>a</sup> | not serious | not serious | not serious | none | 128 | 175 | - | SMD 0.25<br>SD lower<br>(0.5 lower to 0 ) | ⊕⊕⊕○<br>MODERATE |
|---|-------------------|----------------------|-------------|-------------|-------------|------|-----|-----|---|-------------------------------------------|------------------|

**Health-related quality of Life End of treatment**

|   |                   |                      |                      |             |                      |      |    |     |   |                                                     |                  |
|---|-------------------|----------------------|----------------------|-------------|----------------------|------|----|-----|---|-----------------------------------------------------|------------------|
| 2 | randomised trials | serious <sup>a</sup> | serious <sup>b</sup> | not serious | serious <sup>d</sup> | none | 92 | 152 | - | SMD 0.62<br>SD lower<br>(1.52 lower to 0.28 higher) | ⊕○○○<br>VERY LOW |
|---|-------------------|----------------------|----------------------|-------------|----------------------|------|----|-----|---|-----------------------------------------------------|------------------|

**Health-related quality of Life Follow-up**

|   |                   |                      |                      |             |                      |      |    |     |   |                                                     |                  |
|---|-------------------|----------------------|----------------------|-------------|----------------------|------|----|-----|---|-----------------------------------------------------|------------------|
| 2 | randomised trials | serious <sup>a</sup> | serious <sup>b</sup> | not serious | serious <sup>d</sup> | none | 92 | 152 | - | SMD 0.62<br>SD lower<br>(1.52 lower to 0.28 higher) | ⊕○○○<br>VERY LOW |
|---|-------------------|----------------------|----------------------|-------------|----------------------|------|----|-----|---|-----------------------------------------------------|------------------|

**Mindfulness End of treatment**

|   |                   |                      |             |             |             |      |    |     |   |                                                   |                  |
|---|-------------------|----------------------|-------------|-------------|-------------|------|----|-----|---|---------------------------------------------------|------------------|
| 2 | randomised trials | serious <sup>a</sup> | not serious | not serious | not serious | none | 75 | 134 | - | SMD 0.4<br>SD lower<br>(0.69 lower to 0.11 lower) | ⊕⊕⊕○<br>MODERATE |
|---|-------------------|----------------------|-------------|-------------|-------------|------|----|-----|---|---------------------------------------------------|------------------|

**Mindfulness Follow-up**

|   |                   |                      |             |             |                      |      |    |     |   |                                                     |             |
|---|-------------------|----------------------|-------------|-------------|----------------------|------|----|-----|---|-----------------------------------------------------|-------------|
| 2 | randomised trials | serious <sup>a</sup> | not serious | not serious | serious <sup>d</sup> | none | 77 | 136 | - | SMD 0.28<br>SD lower<br>(0.56 lower to 0.01 higher) | ⊕⊕○○<br>LOW |
|---|-------------------|----------------------|-------------|-------------|----------------------|------|----|-----|---|-----------------------------------------------------|-------------|

**Fatigue - not measured**

|  |  |  |  |  |  |  |  |  |   |               |   |
|--|--|--|--|--|--|--|--|--|---|---------------|---|
|  |  |  |  |  |  |  |  |  | - | 0<br>(0 to 0) | - |
|--|--|--|--|--|--|--|--|--|---|---------------|---|

**Workability - not measured**

|  |  |  |  |  |  |  |  |  |   |               |   |
|--|--|--|--|--|--|--|--|--|---|---------------|---|
|  |  |  |  |  |  |  |  |  | - | 0<br>(0 to 0) | - |
|--|--|--|--|--|--|--|--|--|---|---------------|---|

CI: Confidence interval; SMD: Standardised mean difference

## Explanations

- a. The Risk of Bias show High Risk on attrition bias, selection bias and performance bias. In addition there are some uncertainty and unclear risk.
- b. The p-value is low and the I-square is high.
- c. The Risk of Bias show High Risk on attrition bias and performance bias. In addition there are some uncertainty and unclear risk.
- d. The confidence interval goes from a large effect in favor of mindfulness to a small effect in favor of control.
- e. The Risk of Bias show High Risk on performance bias. In addition there are some uncertainty and unclear risk.
