# Supplementary material for: Mindfulness- and acceptance-based interventions for patients with fibromyalgia – A systematic review and meta-analyses
Source: PubMed Central journal article supplement (PMC6719827; doi:10.1371/journal.pone.0221897), 2019-09-03
Supplement: pone.0221897.s007.pdf [file pone.0221897.s007.pdf]

MEDLINE

Search Strategy:

- 
- 1 Fibromyalgia/ (8417)
  - 2 Chronic Pain/ (10259)
  - 3 fibromyalg\*.tw,kf. (9869)
  - 4 (chronic adj1 widespread adj1 pain).tw,kf. (803)
  - 5 or/1-4 (21108)
  - 6 Mindfulness/ (1728)
  - 7 "Acceptance and Commitment Therapy"/ (230)
  - 8 mindfulness\*.tw,kf. (4958)
  - 9 (acceptance and commitment therap\*).tw,kf. (648)
  - 10 ((awareness adj6 attention) and (medit\* or vipassana)).tw,kf. (75)
  - 11 or/6-10 (5692)
  - 12 5 and 11 (235)
  - 13 randomized controlled trial.pt. (505234)
  - 14 controlled clinical trial.pt. (100418)
  - 15 (randomized or placebo or randomly or trial or groups).ab. (2593502)
  - 16 or/13-15 (2740891)
  - 17 12 and 16 (111)
  - 18 limit 17 to yr="1990 -Current" (111)
