# Supplementary material for: Mindfulness- and acceptance-based interventions for patients with fibromyalgia – A systematic review and meta-analyses
Source: PubMed Central journal article supplement (PMC6719827; doi:10.1371/journal.pone.0221897), 2019-09-03
Supplement: pone.0221897.s008.pdf [file pone.0221897.s008.pdf]

## Risk of bias summary

|                    | Random sequence generation (selection bias) | Allocation concealment (selection bias) | Blinding of participants and personnel (performance bias) | Blinding of outcome assessment (detection bias) | Incomplete outcome data (attrition bias) | Selective reporting (reporting bias) | Other bias |
|--------------------|---------------------------------------------|-----------------------------------------|-----------------------------------------------------------|-------------------------------------------------|------------------------------------------|--------------------------------------|------------|
| Astin 2003         | +                                           | +                                       | +                                                         | +                                               | -                                        | ?                                    | +          |
| Cash 2015          | +                                           | ?                                       | ?                                                         | +                                               | ?                                        | ?                                    | +          |
| Grossman 2007      | -                                           | -                                       | +                                                         | +                                               | -                                        | ?                                    | ?          |
| Luciano 2014       | +                                           | +                                       | -                                                         | +                                               | +                                        | ?                                    | ?          |
| Parra-Delgado 2013 | +                                           | ?                                       | -                                                         | +                                               | +                                        | ?                                    | +          |
| Schmidt 2011       | +                                           | +                                       | +                                                         | +                                               | +                                        | +                                    | +          |
| Septon 2007        | +                                           | ?                                       | ?                                                         | +                                               | ?                                        | ?                                    | +          |
| Simister 2018      | +                                           | +                                       | -                                                         | +                                               | +                                        | ?                                    | +          |
| Wicksell 2012      | ?                                           | +                                       | -                                                         | ?                                               | +                                        | ?                                    | +          |

### Reasons for high risk of bias

Astin 2003 et al. (34): Incomplete outcomes; 26 % never attended a class. Of 128 randomized into 2 groups, 50 (39%) dropped out from the study prior to 'end of treatment', 61 (48%) dropped out by week 16, and 63 (49%) failed to complete 24 week assessment.

Grossman 2007 et al. (35): Random sequence generation; quote p. 228: 'A quasi-random allocation to treatments was based upon alternation of small groups of patients according to time of enrollment'. Allocation concealment; Alternation of small groups of patients according to time of enrollment. The first 31 patients who enrolled comprised the initial two MBSR groups; the next consecutive 15 patients formed the control group, which was then followed with subsequent MBSR groups. Incomplete outcomes; 26 of 58 participants in follow-up.

Luciano 2014 et al. (36): Blinding of participants and personnel; Not blinded.

Parra-Delgado 2013 et al. (37): Blinding of participants and personnel; Participants were probably aware of assignment.

Simister 2018 et al. (42): Blinding of participants and personnel; quote p. 743: 'a registered physiotherapist...remained blind to participants' assigned condition for the duration of the study'. Participants were probably aware of assignment

Wicksell 2012 et al. (40): Blinding of participants and personnel; Wait-list control.
